# Supplementary material for: TMEM44-AS1 promotes esophageal squamous cell carcinoma progression by regulating the IGF2BP2-GPX4 axis in modulating ferroptosis
Source: Springer Nature journal article supplement (doi:10.1038/s41420-023-01727-0), 2023-12-01
Supplement: MOESM1 [file 41420_2023_1727_MOESM1_ESM.pdf]

## Supplementary Materials

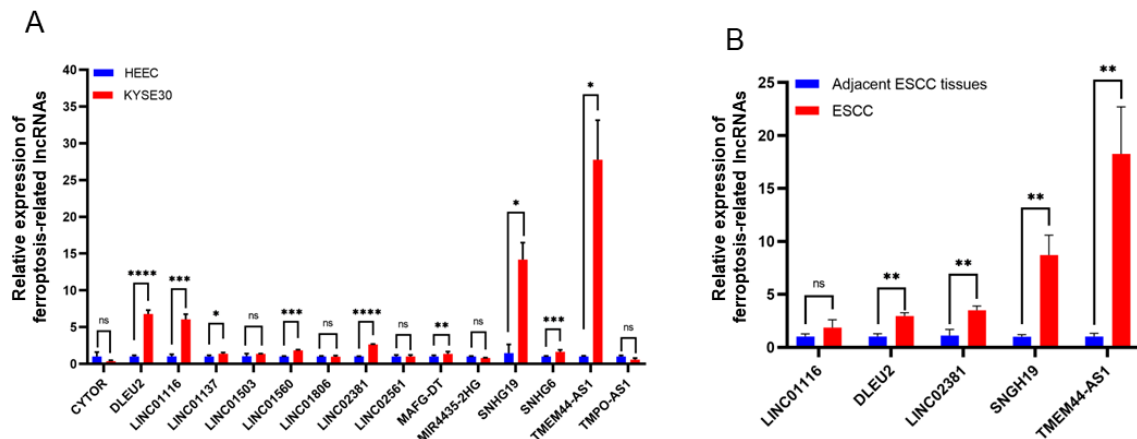

**Supplementary Figure S1. Validation of ferroptosis-related lncRNAs in esophageal cancer.**

**A** qRT-PCR analysis of ferroptosis-related lncRNAs expression in ESCC cells. **B** qRT-PCR analysis of ferroptosis-related lncRNAs expression in esophageal cancer tissues. \* $p < 0.05$ , \*\* $p < 0.01$ , \*\*\* $p < 0.001$ , \*\*\*\* $p < 0.0001$
